# Supplementary material
Source: PubMed Central journal article supplement (PMC11211066)
Supplement: NIHMS2001135-supplement-SI_pdf.pdf [file NIHMS2001135-supplement-SI_pdf.pdf]

## Supporting Information for

### EnzyHTP Computational Directed Evolution with Adaptive Resource Allocation

Qianzhen Shao<sup>1</sup>, Yaoyukun Jiang<sup>1</sup> and Zhongyue J. Yang<sup>1-5,\*</sup>

<sup>1</sup>*Department of Chemistry, Vanderbilt University, Nashville, Tennessee 37235, United States*

<sup>2</sup>*Center for Structural Biology, Vanderbilt University, Nashville, Tennessee 37235, United States*

<sup>3</sup>*Vanderbilt Institute of Chemical Biology, Vanderbilt University, Nashville, Tennessee 37235, United States*

<sup>4</sup>*Data Science Institute, Vanderbilt University, Nashville, Tennessee 37235, United State*

<sup>5</sup>*Department of Chemical and Biomolecular Engineering, Vanderbilt University, Nashville, Tennessee 37235, United States*

*\*Corresponding author's email: zhongyue.yang@vanderbilt.edu*

#### Contents

|                                                                                                                                                                      |          |
|----------------------------------------------------------------------------------------------------------------------------------------------------------------------|----------|
| <b>Figure S1.</b> Architecture of the ARMer Python library                                                                                                           | Page S2  |
| <b>Text S1.</b> Details about Architecture of the ARMer Python library                                                                                               | Page S3  |
| <b>Figure S2.</b> Example code of ARMer API.                                                                                                                         | Page S5  |
| <b>Figure S3.</b> A sample job script that performs QM calculation using Gaussian 16                                                                                 | Page S6  |
| <b>Figure S4.</b> Structure of FAcD K83D mutant and the active site cluster                                                                                          | Page S7  |
| <b>Figure S5.</b> The comparison of computing resource cost                                                                                                          | Page S8  |
| <b>Figure S6.</b> The comparison of wall-clock time cost                                                                                                             | Page S9  |
| <b>Figure S7.</b> The comparison between modelled sidechain conformation and the experimentally determined sidechain conformation upon the mutation of I7D and N224D | Page S10 |
| <b>Figure S8.</b> The comparison between modelled substrate binding configurations and experimentally determined binding configurations                              | Page S11 |
| <b>Figure S9.</b> More structures of modelled substrate binding configurations                                                                                       | Page S12 |
| <b>Text S2.</b> Details of the benchmark workflow                                                                                                                    | Page S13 |
| <b>Text S3.</b> Choice of parallelization strategy                                                                                                                   | Page S13 |
| <b>Text S4.</b> Discrepancy of expected and actual speed up from ARMer parallelization                                                                               | Page S13 |
| <b>Text S5.</b> Details of the thermostability score calculation using cartesian_ddg                                                                                 | Page S14 |
| <b>Text S6.</b> Details of structure preparation and parameterization                                                                                                | Page S14 |
| <b>Text S7.</b> Details of the molecular dynamics simulation                                                                                                         | Page S15 |
| <b>Figure S10.</b> Geometric restraints applied in the MD simulation                                                                                                 | Page S15 |
| <b>Text S8.</b> Details of the electrostatic stabilization energy calculation                                                                                        | Page S16 |
| <b>Text S9.</b> Specifications of hardware used in this work                                                                                                         | Page S16 |
| <b>Text S10.</b> Statistical analysis for the chance of randomly identifying the two target mutants in the top-ranked mutants                                        | Page S17 |
| <b>Table S1.</b> List of mutants in the computational directed evolution workflow                                                                                    | Page S18 |
| <b>Table S2.</b> List of mutants with $G_{elec}$ calculated based on the first 50ns of the MD                                                                        | Page S24 |
| <b>Reference</b>                                                                                                                                                     | Page S28 |

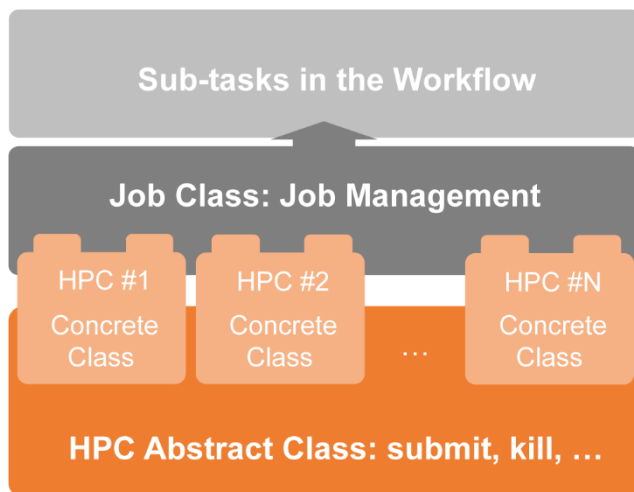

**Figure S1.** Architecture of the ARMer Python library

## Text S1. Details about the architecture of the ARMer Python library

**The Job class:** Defined in the Job class, a job object is instantiated using the constructor *config\_job()*, where the arguments *commands*, *cluster*, *env\_settings*, and *res\_keywords* are provided by the user (Supporting Information, Figure S2). Specifically, *commands* refers to the target shell commands for running external software for a specific enzyme modeling sub-task (e.g., *commands* = “g16 < filename.gjf > filename.out”); *cluster* refers to an HPC class object that contains miscellaneous details about user’s local HPC (e.g., *cluster* = *Accre()*, in which ACCRE refers to our local HPC at Vanderbilt University. Note that it is easy to support other HPCs by defining other HPC classes base on the “plug-in” interface); *env\_settings* states environment settings of external software (e.g., *env\_settings* = “”module load Gaussian/16.B.01””). Even for the same external software (e.g., Gaussian 16<sup>1</sup>), the environment settings likely differ in different HPC clusters. Finally, *res\_keywords* configures computing resources for the job (e.g., *res\_keywords* = ‘core\_type’ : ‘cpu’, ‘nodes’:’1’, ‘node\_cores’ : ‘8’, ‘job\_name’ : ‘EnzyHTP\_QMCluster’, ‘partition’ : ‘production’, ‘mem\_per\_core’ : ‘3G’, ‘walltime’ : ‘24:00:00’), in which the parameters depend on the computational task (e.g., 8-24 CPUs for QM calculation, 1 GPU for MD calculation, etc.).

**The HPC classes:** The HPC class files are stored in a folder named “cluster”. In the folder, *\_interface.py* defines an abstract HPC class as the code interface and *accre.py* defines an example concrete HPC class we made for our local HPC at Vanderbilt. Users can create new files under this folder defining new concrete HPC classes to easily modify ARMer Python library to be compatible with their local HPC cluster. The instances of the HPC class are used as input for generating the Job instance. The methods of the HPC class are used by the Job instance through the HPC instance to interface with the corresponding local HPC cluster. The new HPC class user defines is required to fulfill the code interfaced defined by the abstract HPC class in *\_interface.py* to make sure they are compatible with the Job class. It is enforced by requiring (by the Job class) all HPC classes to inherit the abstract HPC class so that the new HPC class has to define some required methods (otherwise python will raise an error). Here is an example explaining how a new HPC is supported by a new HPC class:

To execute the *submit()* method in the Job class for job submission, only the *parser\_resource\_str()* method and the *submit\_job()* method from *cluster* (a concrete HPC class instance) are called. Both *parser\_resource\_str()* and *submit\_job()* are required by the code interface in the abstract HPC class to “parser general resource keywords to an HPC specified paragraph (Figure S3, upper part)” and “run shell commands to submit the job submission script in the submission directory (e.g.: sbatch xxx.sh)”, respectively. A user can define a new HPC class inheriting the abstract HPC class and defines the two methods mentioned above easily with several lines of code (e.g.: running the corresponding shell command of the job scheduler on the HPC, similar to the corresponding method in *accre.py*) to have the *submit()* method in Job class support a new HPC. It is the same for all the other methods in the Job class, as long as the new HPC class fulfills the code interface, which is enforced, the method in the Job class will function normally on the corresponding new HPC.

Notably, ARMer achieves job management through interacting with the job scheduling system of HPCs. As such, ARMer cannot function properly with the HPCs where there is no implementation of the job scheduling system. Neither does it work with the job scheduling system that does not fully support the task of 1) submitting a job, 2) killing/holding/releasing a job with the job ID, or 3) obtaining job status (for job monitoring) with the job ID.

```

from armer import ClusterJob
import clusters

cluster = clusters.accre.Accre()

# case 1 single submission
job = ClusterJob.config_job(
    commands = "g16 < xxx.gjf > xxx.out",
    cluster = cluster,
    env_settings = cluster.G16_ENV['CPU'],
    res_keywords = {'core_type' : 'cpu',
                   'nodes' : '1',
                   'node_cores' : '8',
                   'job_name' : 'TEST',
                   'partition' : 'production',
                   'mem_per_core' : '3G',
                   'walltime' : '24:00:00',
                   'account' : 'xxx'}
)
job.submit(sub_dir="./")
job.wait_to_end(period=10)

# case 2 array submission
jobs = []
for i in range(10):
    jobs.append(ClusterJob.config_job(
        commands = f"g16 < xxx_{i}.gjf > xxx_{i}.out",
        cluster = cluster,
        env_settings = cluster.G16_ENV['CPU'],
        res_keywords = {'core_type' : 'cpu',
                       'nodes' : '1',
                       'node_cores' : '8',
                       'job_name' : 'TEST',
                       'partition' : 'production',
                       'mem_per_core' : '3G',
                       'walltime' : '24:00:00',
                       'account' : 'xxx'},
        sub_dir="./"
    )
)
ClusterJob.wait_to_array_end(jobs, period=30, array_size=5)

```

**Figure S2.** Example code of the ARMer API

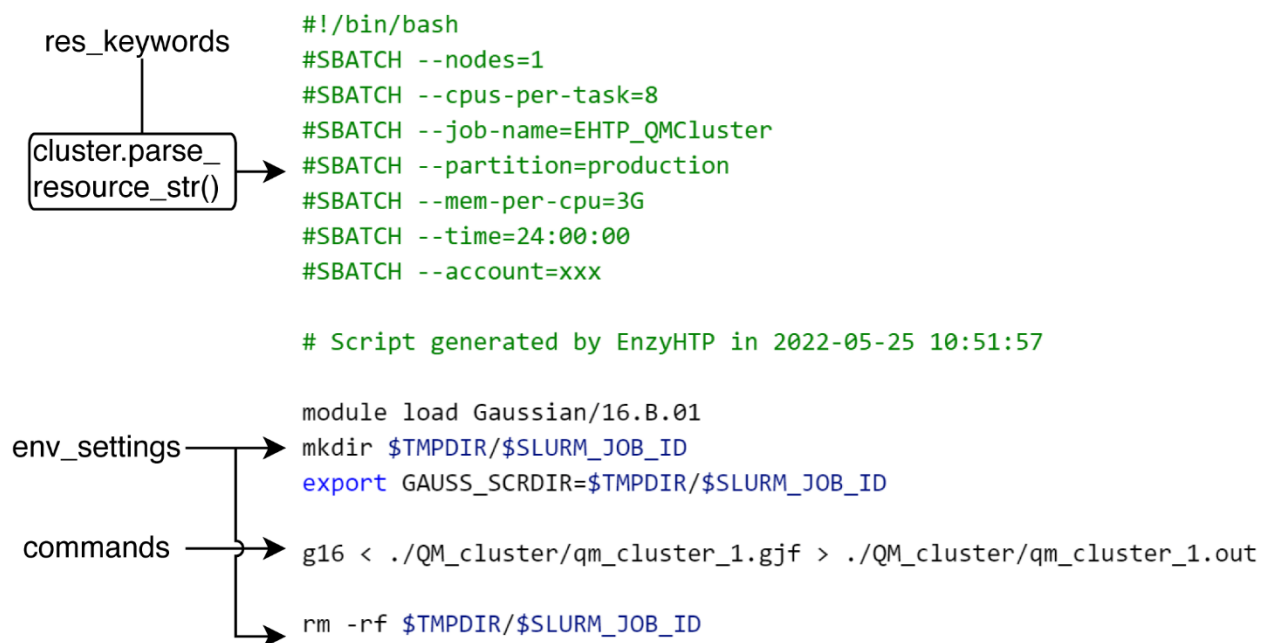

**Figure S3.** A sample job script that performs QM calculation using Gaussian 16. The job script is generated by the “workflow script” using commands implemented in ARMer.

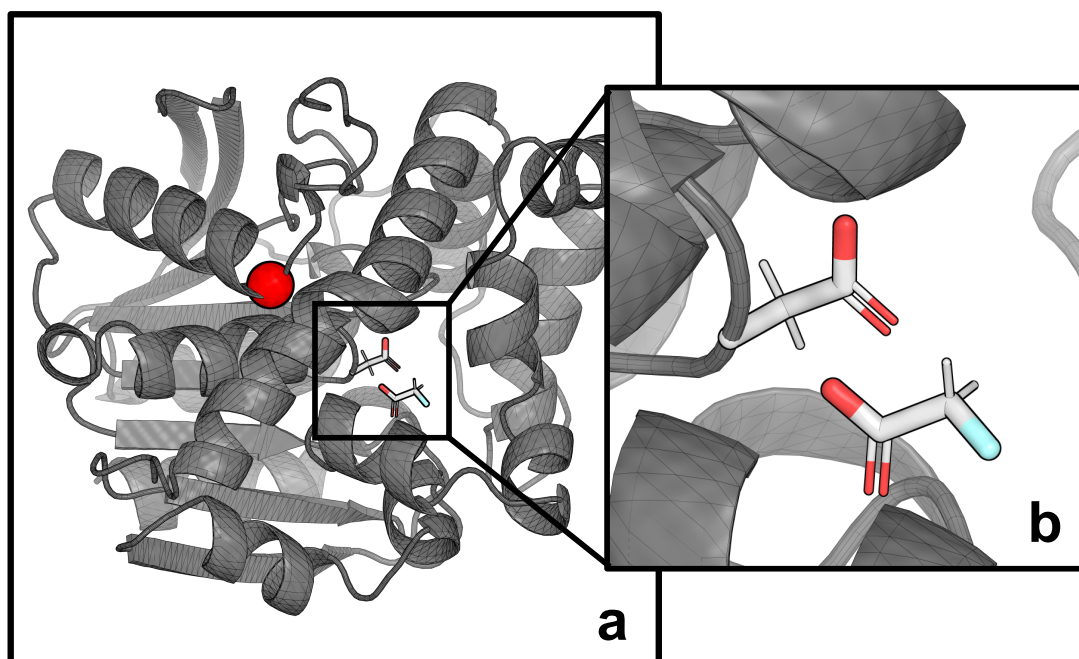

**Figure S4.** (a) Structure of FAcD K83D mutant and (b) the active site cluster.

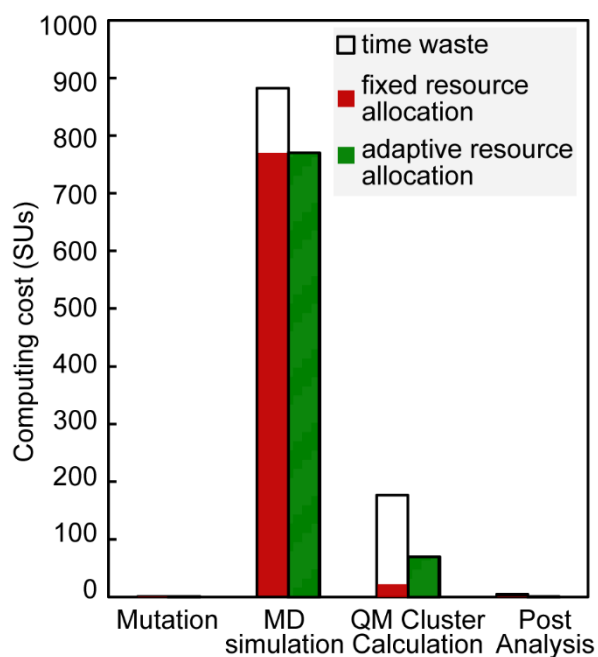

**Figure S5.** The comparison of computing resource cost between fixed resource allocation (in red) and adaptive resource allocation (in green) for each sub-task in the enzyme FAcD modeling workflow using EnzyHTP. The resource time-waste is colored in white. The computational cost is represented by core-hours or SUs. To normalize the computational cost across CPU and GPU, a weighting factor (i.e., 1 SU of GPU = 54 SUs of CPU) is applied based on the high-performance linpack benchmark.



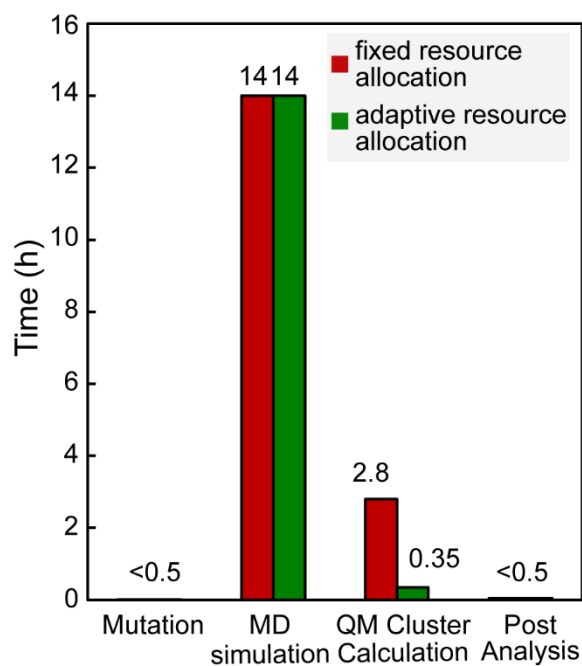

**Figure S6.** The comparison of wall-clock time cost between fixed resource allocation (in red) and adaptive resource allocation (in green) for each sub-task in the enzyme FAcD modeling workflow using EnzyHTP. Noticeably, the magnitude of efficiency acceleration (8-fold) is less than the ideal condition with parallel job submission (25-fold). The discrepancy is mainly caused by difference of CPU performance in ACCRE and the queueing time (Supporting Information Text S2).

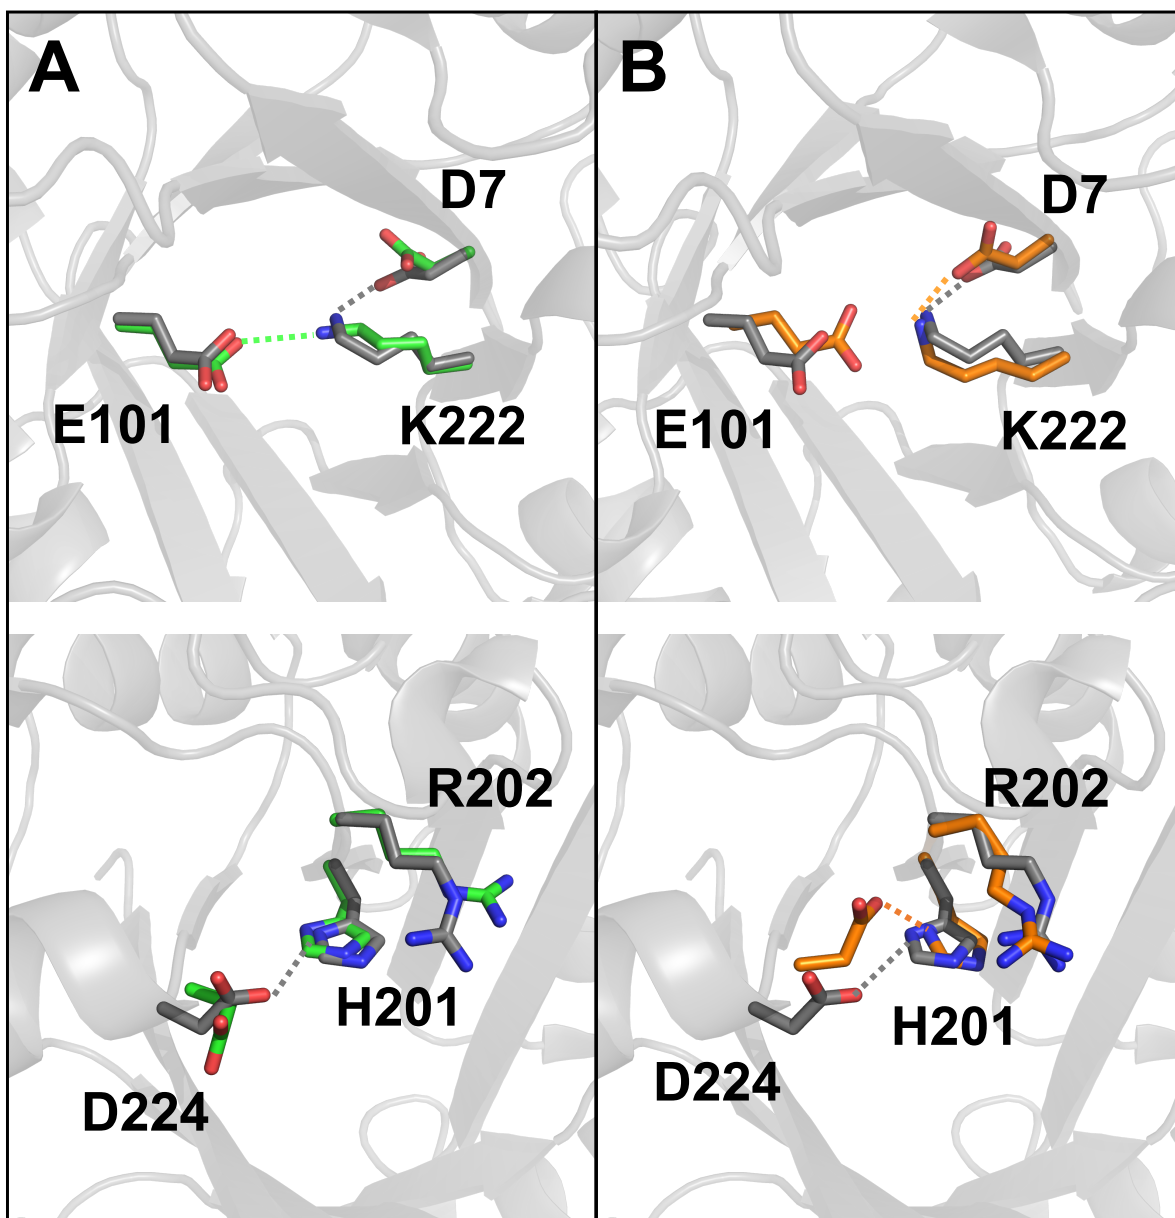

**Figure S7.** The comparison between EnzyHTP-modeled sidechain conformation (A: generated by the mutation engine; B: the last frame of the MD equilibrium run) and the experimentally determined sidechain conformation upon the mutation of I7D (shown in the upper two panes) and N224D (shown in the lower two panes). The structures colored in grey are obtained from the crystal structure of an apo-R4 mutant (I7D K146E G202R N224D, PDB code: 3IIO). The structures colored in green are obtained from the structure of R5\_11-substrate complex generated by the mutation engine of EnzyHTP. The structures colored in orange are obtained from the structure of R5\_11-substrate complex after the MD equilibrium run. All hydrogens are hidden. The key H-bond interaction are noted as dotted line. The structures are oriented to be comparable with the analysis from Khersonsky *et al.*<sup>2</sup>

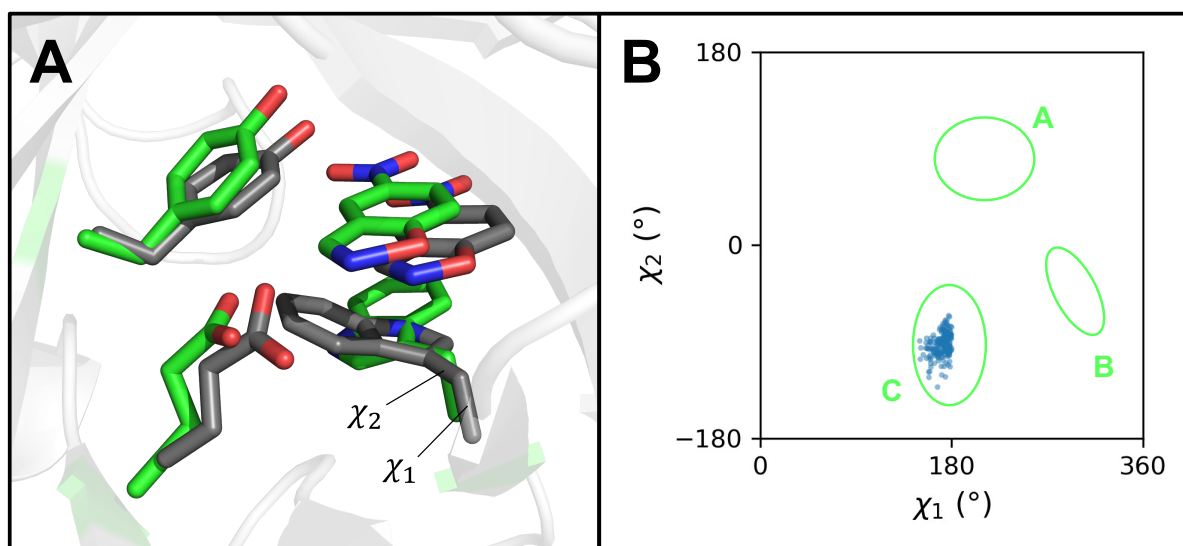

**Figure S8.** The comparison between modelled substrate binding configurations and experimentally determined binding configurations. (A) The comparison between EnzyHTP modelled substrate binding configuration and experimentally determined binding configuration C. Grey structure is representative structure of the MD trajectory generated by EnzyHTP. The structure of R5\_11 is used as an example here. In total 6 representative structures are collected, all of them are in configuration A, only the 1<sup>st</sup> structure is shown here for clarity. (Find all representative structures for all top-ranked mutants in SI.zip) All hydrogens are hidden here.  $\chi_1$  and  $\chi_2$  are defined here by the corresponding rotating bond of labelling. (B) The distribution of W50 conformations of all representative structures of all top-ranking mutants. The figure is made that it is comparable to the figure from Hong *et al.*<sup>3</sup> The region corresponding to the 3 different binding configurations A, B, and C are noted in green (defined by the work of Hong *et al.*)

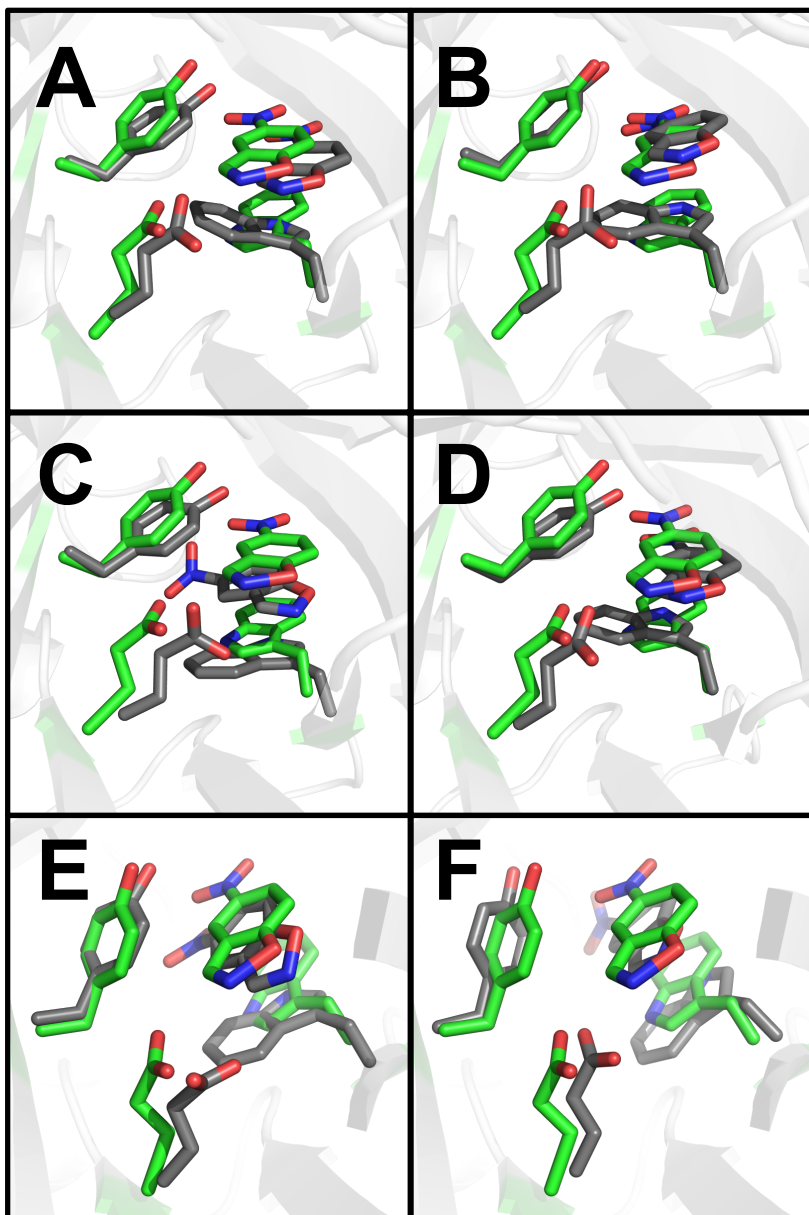

**Figure S9.** The binding configuration C (grey) from crystal structure (PDB code: 6CT3) comparing with 1<sup>st</sup> representative structure (green) of MD trajectories generated by EnzyHTP for the four experimentally-observed mutants (A) R5\_11 (B) R5\_12 (C) R6\_71 (D) R6\_72 and the No. 1 ranking mutant of each round (E) R5\_1 - I7D K146E G202R N224D I102L (F) R6\_85 - I7S K19E G202R N224D S144H R175W H201K G145W

## **Text S2.** Details of the benchmark workflow

The first sub-task of the workflow uses the mutant generation module in EnzyHTP to generate a mutant structure (i.e, K83D, Supporting Information Figure S3a) and then optimizes the structure with molecular mechanics using the PMEMD module in AMBER. The time cost for mutant structure construction is nearly negligible and that for minimization takes ~30 seconds on 1 GPU. The second sub-task samples 100 conformers from a 100 ns MD trajectory simulated by the PMEMD module. The time cost of this step is ~14 hours on 1 GPU. Similarly, the computational cost for automatic preparation of MD input files can be omitted. Based on each of the sampled snapshot, the third sub-task conducts QM calculations of single point energy on the active site cluster (i.e., substrate + Asp110, Supporting Information Figure S3b) at the level of PBE0/def2TZVP using Gaussian 16. In total, 100 independent QM calculations should be conducted. With 8 CPUs, each calculation takes ~2 minutes to complete. The last sub-task involves post electronic structure analysis to obtain electrostatic stabilization energy, which is derived from the projection of protein electric field (computed by the point charges of enzyme residues with built-in EnzyHTP function) to the dipole of reacting bond (computed by Multiwfn<sup>4</sup>). The whole analysis take ~0.1 hours using 1 CPU. Overall, the entire workflow involves different types of modeling sub-tasks with diverse requirement of computing resources.

## **Text S3.** Choice of parallel strategy

Parallelization of QM calculation (QM cluster single point energy for 100 snapshots) can be done by requesting either 1) 800 CPUs in one job and handle the parallelization of 100 Gaussian calculation in Python, or 2) 8 CPUs in each job but creating 100 jobs for each Gaussian calculation. We did not choose the first strategy since the resource request goes beyond the capacity in our HPC cluster. HPC are designed to share resources with users across campus. Requesting such a large amount of resources in one job will have a very long queue time and is disturbing the ecosystem of the HPC. For a situation the involves the operation of 100 mutations, there will be 80000 CPU expected to run at the same time. The resource demand is more than the total amount of CPU cores on ACCRE. In contrast, the second solution suits the ecosystem of HPC. It submits jobs to the job queue in a unit of 8 CPU instead of 800 CPU. This will make the queue time less significant and ARM's array submission is set perfectly for its implementation. There will be a maximum number of jobs that can exist on the job queue so that other users won't be influenced by the unexpected long queue time.

## **Text S4.** Discrepancy between ideal and actual speed up from ARMer parallelization

Two reasons contribute to the discrepancy. First, the CPU performances are different. On ACCRE, the CPU installed on the GPU node is tested to be ~1.8 times faster than a regular CPU used in the resource allocation test. Second, queue time become significant when 100 calculations are submitted as 100 individual jobs. There are ~10 min queue time in total while the total running time cost is merely 20 min. However, with larger QM region and higher level

of QM theory, the total running time is expected to be much longer. As such, the fraction of queuing time will become less significant.

**Text S5.** Details of the thermostability score calculation using `cartesian_ddg`.

We interfaced the Rosetta `cartesian_ddg` application in EnzyHTP to perform the thermostability calculation in a high-throughput workflow. The interface was implemented as `get_rosetta_ddg()` function in EnzyHTP. While traditional `cartesian_ddg` calculation is limited to running on a single CPU process, ARMer library provides a simple solution to parallelize the `cartesian_ddg` calculation by submitting the calculation of each mutant as a single-core job in a job array using `wait_to_array_end()` function of the ARMer library.

Below are detailed configurations of the `cartesian_ddg` calculation in this work:

The reference structure, i.e., one of the starting variants of R5, I7D K146E G202R N224D, was used as the starting structure for the thermostability calculation. We used the same structure as the reference for all mutants to reduce the errors involved in the evaluation of mutation effects. The reference structure was first relaxed using the Rosetta `relax` application<sup>5</sup> (`relax_with_rosetta()` in EnzyHTP) as recommend in the `cartesian_ddg` tutorial by RosettaCommons. 20 decoys were made per input structure and the one with the lowest total energy is returned by the function as the input structure for the subsequent `cartesian_ddg` calculation. `Cartesian_ddg`'s calculation is based on the reference and mutant conformations sampled in Rosetta using a Monte Carlo method. The conformational sampling involves only all contacting residues within 5.0 Å away from the mutation site. We conducted 10 iterations of such conformational sampling for both the reference and the mutants. The folding free energy calculation of these structures was performed using a Cartesian coordinate representation of the protein structure, and the pairwise interactions were evaluated by the full-atom energy function within 9.0 Å from the mutation site. The free energy difference between the average of the 10 iterations of the mutant and the reference is defined as folding free energy change upon mutation and is used as the thermostability score with a Rosetta energy unit (REU).

We also tested the protocol in which the thermostability score was computed directly from the crystal structure of the mutant. We used the crystal structure of R6\_72, which corresponds to R6 3/7F in the original experimental study, as the input structure (PDB code: 5D32<sup>3</sup>) and calculated the Rosetta `cartesian_ddg` score relative to the reference structure by mutating it back. The result is 3.29 REU, which is close to the value calculated using the reference structure (i.e., 1.45 REU).

**Text S6.** Details of structure preparation and parameterization.

The crystal structure of KE07 was curated from the Protein Data Bank (PDB ID: 2RKX<sup>6</sup>). All crystallizing water molecules were removed for model construction. We used PyMol<sup>7</sup> to align the substrate-bound KE07 design model<sup>6</sup> with the crystal structure. The aligned design model was used to add the missing residues in the crystal structure (Glu251 to Leu253) and to construct the KE07-substrate complex, which was then prepared for MD simulations with the

AMBER 18 tLEaP tool.<sup>8</sup> The protein was modeled using AMBER ff14SB force field.<sup>9</sup> The generalized AMBER force field<sup>10, 11</sup> was used to parametrize the substrate whose structure was obtained from the PDB structure with the annotation of H5J (5-nitro-1,2-benzoxazole). AM1-BCC model was used to determine the atomic charges of the substrate.<sup>12</sup> The coordinate of hydrogens and protonation states of titratable residues in the enzyme were determined by the *get\_protonation()* method in EnzyHTP. (powered by PDB2PQR<sup>13</sup> and PROPKA3<sup>14</sup>)

**Text S7.** Details of the molecular dynamics simulation using AMBER18.

We performed MD simulations of the mutant-substrate complexes using the AMBER 18 software package.<sup>8</sup> The SHAKE algorithm<sup>15</sup> was used to constrain all hydrogen-containing bonds. To sample near transition state conformations throughout the simulations, we applied geometric restraints on the forming O-H distance and the O-H-C orbital interacting angle between the substrate and Glu101 from minimization to production runs (Figure S10). The enzyme complexes were solvated in a periodic truncated octahedron box with a 10 Å buffer of TIP3P water and were neutralized with Na<sup>+</sup> counterions. For each mutant complex, we first relaxed the whole solvent box using the steepest descent method for 10000 steps followed by the conjugate gradient method for another 10000 steps. After minimization, we heated each box from 0 to 300 K within 36 ps with constant volume, equilibrated it for 4 ps under constant volume at 300 K, and further equilibrated at 300 K and 1 atm for 1 ns. In addition, we restrained the backbone C<sub>α</sub> and amide C and N atoms with a weight of 2 kcal·mol<sup>-1</sup>·Å<sup>-2</sup> from minimization to equilibration. After equilibration, we carried out production runs for 110 ns and output the trajectories every 100 ps. The snapshots from the last 100 ns of the production run were used for analyses, resulting in a total of 1000 snapshots for each production run. All simulations were performed with a time step of 2 fs. The Langevin thermostat<sup>16</sup> and Berendsen barostat<sup>17</sup> were used to control the temperature and pressure, respectively.

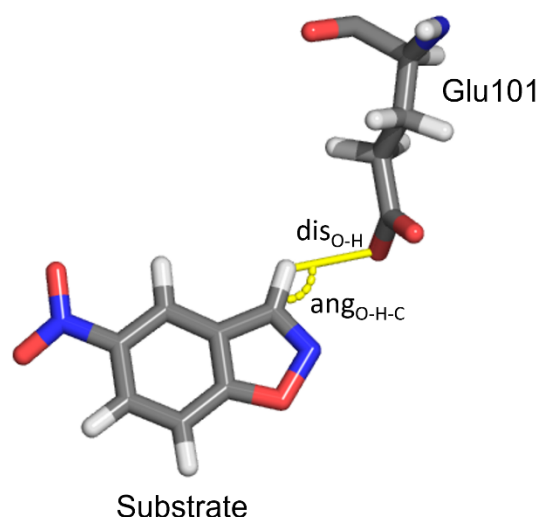

**Figure S10.** Geometric restraints applied in the MD simulation. The upper distance limit between Glu101 carbonyl O and substrate leaving H, *dis<sub>O-H</sub>*, is 2.50 Å. The allowed angle range of Glu101 carbonyl O, substrate leaving H, and substrate deprotonated C, *ang<sub>O-H-C</sub>*, is between

150.0 and 180.0°. If the distance or angle is out of the defined range, a 100 kcal mol<sup>-1</sup> Å<sup>-2</sup> or 100 kcal mol<sup>-1</sup> rad<sup>-2</sup> weight is applied, respectively.

**Text S8.** Details of the electrostatic stabilization energy calculation.

The *get\_field\_strength()* method in EnzyHTP is used to calculate the field strength of the enzyme electric field on the center of the reacting bond (the breaking C–H bond) projecting along the bond direction. MM charges generated by tLEaP is used in the calculation. The method returns the result as a list of field strength for all sampled frames from MD. The *get\_bond\_dipole()* method in EnzyHTP is used to calculate the bond dipole of the same reacting bond. The method returns the result as a list of bond dipole for all sampled frames from MD in the same order as the field strength list. To obtain the electrostatic stabilization energy  $G_{\text{elec}}$  for a specific MD snapshot, one needs to calculate the negative dot product between the field strength and bond dipole moment. Notably, the  $G_{\text{elec}}$  is only calculated for the pre-reaction complex (the conformation that is assumed to readily form transition state with minimal geometrical change), but not the reactant or the transition state structure. Although  $G_{\text{elec}}$  values have been used to identify the beneficial mutants, a more physically meaningful index would be  $\Delta G_{\text{elec}}$ , which is the difference of electrostatic stabilization energy between the transition state and the reactant. Additionally, the electric field calculated in this work is based on MM charges. We are working on implementing a Tinker interface in EnzyHTP2 to support electric field calculation using polarizable force field. Polarizable force field has been suggested by Bradshaw *et al.* to be more accurate in modeling the electric field.<sup>18</sup>

**Text S9.** Specifications of hardware used in this work.

The simulations enabled by the EnzyHTP & ARMer workflow was preform on the Advanced Computing Center for Research and Education (ACCRE) cluster at Vanderbilt University. For CPU jobs, the “production” partition on the cluster was used. Typical compute nodes in the partition each have 128 or 256 GB of memory and equipped with Intel(R) Xeon(R) CPU E5-2420 or Intel(R) Xeon(R) CPU E5-2630 v3. They all run a 64-bit Linux OS and have a 250 GB – 1 TB hard drive and dual copper gigabit Ethernet ports.

For GPU jobs, the “Pascal” and “Turing” partition on the cluster was used. Typical compute nodes in the partition are each equipped with Nvidia Titan X or GeForce RTX 2080 Ti GPU cards, and are also interconnected with a low-latency 25 or 40/56 Gb/s RoCE network. All compute nodes are monitored via Nagios. Resource management, scheduling of jobs, and usage tracking are handled by an integrated scheduling system by SLURM.

**Text S10.** Statistical analysis for the chance of randomly identifying the two target mutants in the top-ranked mutants.

For R5, the total number of mutants is 62, the number of experimentally-observed mutants (target) is 2.



Chance for randomly picking a group of 12 mutants and finding the 2 targets in the group =

$$\frac{C_{60}^{10}}{C_{62}^{12}} = 3.5\%$$

For R6, the total number of mutants is 122, the number of experimentally-observed mutants (target) is 2.

Chance for randomly picking a group of 20 mutants and finding the 2 targets in the group =

$$\frac{C_{120}^{18}}{C_{122}^{20}} = 2.6\%$$

For the overall process, the chance for randomly picking the 2 targets from R5 and also 2 targets from R6 is  $3.5\% \times 2.6\% = 0.091\%$ .

**Table S1.** List of mutants in different stages of the computational directed evolution workflow. (Mutation notations are relative to KE-07, thermostabilities are calculated relative to one of the starting variants of R5, I7D K146E G202R N224D)

### 6 Starting variants (R5)

|                                               |
|-----------------------------------------------|
| I7D K146E G202R N224D                         |
| I7T K146T I199Q F86L I173V L176D F227L        |
| I7S K19E G202R N224D                          |
| I7V K146E I199Q N224D L162P I173A L176I F229S |
| I7Q K146E I199V N224D F227L                   |
| I7Q K146E G202R N224D F229S                   |

### Mutant library of 62 mutants (single amino acid substitution) (R5)

| Index | Mutant                                       | Relative Thermostability (REU) | G <sub>elec</sub> (kcal/mol) |
|-------|----------------------------------------------|--------------------------------|------------------------------|
| R5_1  | I7D K146E G202R N224D I102L                  | -2.4294                        | 0.462064                     |
| R5_2  | I7D K146E G202R N224D G80I                   | 31.2548                        | 1.734618                     |
| R5_3  | I7D K146E G202R N224D I151T                  | 2.1779                         | 1.177025                     |
| R5_4  | I7D K146E G202R N224D I83A                   | 10.4976                        | 2.115255                     |
| R5_5  | I7D K146E G202R N224D L241K                  | 19.8741                        | 1.442738                     |
| R5_6  | I7D K146E G202R N224D S55P                   | 18.3155                        | 1.423922                     |
| R5_7  | I7D K146E G202R N224D S122C                  | -1.8241                        | 2.108269                     |
| R5_8  | I7D K146E G202R N224D D28H                   | 6.1621                         | 0.568817                     |
| R5_9  | I7D K146E G202R N224D L10E                   | 12.2746                        | 1.706855                     |
| R5_10 | I7D K146E G202R N224D I83E                   | 13.2609                        | 1.404584                     |
| R5_11 | I7D G202R N224D V12M                         | 1.126                          | 0.873856                     |
| R5_12 | I7D K146E G202R N224D L47I                   | 2.776                          | 2.000201                     |
| R5_13 | I7T K146T I199Q F86L I173V L176D F227L V125N | 13.683                         | 1.394202                     |
| R5_14 | I7T K146T I199Q F86L I173V L176D F227L I75T  | 16.2216                        | 2.124284                     |
| R5_15 | I7T K146T I199Q F86L I173V L176D F227L G136A | 7.5485                         | 0.549972                     |
| R5_16 | I7T K146T I199Q F86L I173V L176D F227L L215C | 5.204                          | 1.584209                     |
| R5_17 | I7T K146T I199Q F86L I173V L176D F227L T53Y  | 4.9345                         | 2.400544                     |
| R5_18 | I7T K146T I199Q F86L I173V L176D F227L E231S | 1.576                          | 1.307885                     |
| R5_19 | I7T K146T I199Q F86L I173V L176D F227L D85W  | 3.768                          | 2.09752                      |
| R5_20 | I7T K146T I199Q F86L I173V L176D F227L L94R  | 5.6372                         | 1.202644                     |
| R5_21 | I7T K146T I199Q F86L I173V L176D F227L E64W  | -4.8982                        | 2.001677                     |
| R5_22 | I7T K146T I199Q F86L I173V L176D F227L F77V  | 7.3068                         | 1.682689                     |
| R5_23 | I7S K19E G202R N224D L26A                    | 13.3037                        | 2.419008                     |
| R5_24 | I7S K19E G202R N224D V190M                   | 3.312                          | 1.81938                      |
| R5_25 | I7S K19E G202R N224D E87I                    | -2.0295                        | 2.176079                     |
| R5_26 | I7S K19E G202R N224D S144Y                   | 1.0709                         | 2.341676                     |

|       |                                                        |         |          |
|-------|--------------------------------------------------------|---------|----------|
| R5_27 | I7S K19E G202R N224D S144H                             | -0.3474 | 1.931238 |
| R5_28 | I7S K19E G202R N224D E71Q                              | -2.5053 | 2.061092 |
| R5_29 | I7S K19E G202R N224D E239M                             | -3.3136 | 1.782684 |
| R5_30 | I7S K19E G202R N224D E64M                              | -3.6519 | 2.481016 |
| R5_31 | I7S K19E G202R N224D G164Q                             | -0.5316 | 2.071931 |
| R5_32 | I7S K19E G202R N224D I168W                             | 16.0304 | 2.259422 |
| R5_33 | I7V K146E I199Q N224D L162P I173A L176I F229S<br>R5K   | 39.5956 | 1.553637 |
| R5_34 | I7V K146E I199Q N224D L162P I173A L176I F229S<br>H209E | 50.3112 | 3.37698  |
| R5_35 | I7V K146E I199Q N224D L162P I173A L176I F229S<br>N109F | 29.9434 | 2.632079 |
| R5_36 | I7V K146E I199Q N224D L162P I173A L176I F229S<br>G121R | 38.4373 | 2.36312  |
| R5_37 | I7V K146E I199Q N224D L162P I173A L176I F229S<br>T195Q | 43.1603 | 1.745177 |
| R5_38 | I7V K146E I199Q N224D L162P I173A L176I F229S<br>L211N | 52.1307 | 2.53346  |
| R5_39 | I7V K146E I199Q N224D L162P I173A L176I F229S<br>V79N  | 53.1849 | 3.001068 |
| R5_40 | I7V K146E I199Q N224D L162P I173A L176I F229S<br>L237E | 56.044  | 1.309283 |
| R5_41 | I7V K146E I199Q N224D L162P I173A L176I F229S<br>L196Q | 47.4261 | 2.370785 |
| R5_42 | I7V K146E I199Q N224D L162P I173A L176I F229S<br>L35E  | 56.2644 | 2.962428 |
| R5_43 | I7Q K146E I199V N224D F227L F38G                       | 12.5548 | 2.560619 |
| R5_44 | I7Q K146E I199V N224D F227L V127M                      | 6.0127  | 1.298944 |
| R5_45 | I7Q K146E I199V N224D F227L E231I                      | -6.3458 | 2.875185 |
| R5_46 | I7Q K146E I199V N224D F227L L176S                      | -0.342  | 2.815547 |
| R5_47 | I7Q K146E I199V N224D F227L W50E                       | 6.5927  | -0.31737 |
| R5_48 | I7Q K146E I199V N224D F227L Q123C                      | -4.9201 | 2.41841  |
| R5_49 | I7Q K146E I199V N224D F227L E212T                      | -3.5428 | 3.11804  |
| R5_50 | I7Q K146E I199V N224D F227L I232G                      | 13.5628 | 1.11532  |
| R5_51 | I7Q K146E I199V N224D F227L V33K                       | 10.0982 | 1.250266 |
| R5_52 | I7Q K146E I199V N224D F227L K4E                        | 11.844  | 1.888153 |
| R5_53 | I7Q K146E G202R N224D F229S G96L                       | -0.93   | 2.03562  |
| R5_54 | I7Q K146E G202R N224D F229S N103Q                      | -2.5568 | 1.278448 |
| R5_55 | I7Q K146E G202R N224D F229S G177P                      | 16.0494 | 2.216208 |
| R5_56 | I7Q K146E G202R N224D F229S A223R                      | 15.2292 | 2.154399 |
| R5_57 | I7Q K146E G202R N224D F229S L237R                      | 17.543  | 2.364616 |
| R5_58 | I7Q K146E G202R N224D F229S A220F                      | 4.7706  | 2.259814 |
| R5_59 | I7Q K146E G202R N224D F229S P197W                      | -0.0449 | 1.872679 |

|       |                                   |         |          |
|-------|-----------------------------------|---------|----------|
| R5_60 | I7Q K146E G202R N224D F229S K132S | 1.5713  | 1.797461 |
| R5_61 | I7Q K146E G202R N224D F229S G36W  | 41.3776 | 2.335375 |
| R5_62 | I7Q K146E G202R N224D F229S D51P  | 9.2742  | 2.060396 |

## 12 Starting Variants (R6)

|                                              |
|----------------------------------------------|
| I7D K146E G202R N224D I102L                  |
| I7D G202R N224D V12M                         |
| I7D K146E G202R N224D I151T                  |
| I7Q K146E G202R N224D F229S N103Q            |
| I7T K146T I199Q F86L I173V L176D F227L E231S |
| I7S K19E G202R N224D E239M                   |
| I7Q K146E G202R N224D F229S K132S            |
| I7S K19E G202R N224D V190M                   |
| I7Q K146E G202R N224D F229S P197W            |
| I7S K19E G202R N224D S144H                   |
| I7D K146E G202R N224D L47I                   |
| I7T K146T I199Q F86L I173V L176D F227L E64W  |

## Mutant library of 122 mutants (triple amino acid substitution) (R6)

| Index | Mutant                                              | Relative<br>Thermostability<br>(REU) | G <sub>elec</sub><br>(kcal/mol) |
|-------|-----------------------------------------------------|--------------------------------------|---------------------------------|
| R6_1  | I7D K146E G202R N224D I151T A200E T104P T61V        | 21.2327                              | 0.614574                        |
| R6_2  | I7D K146E G202R N224D I151T E34Y Q118Y E212T        | 6.5956                               | 1.628815                        |
| R6_3  | I7D K146E G202R N224D I151T V134F E64Q S111M        | 0.3563                               | 1.018563                        |
| R6_4  | I7D K146E G202R N224A I151T N247E Y143K             | 9.1533                               | 0.55926                         |
| R6_5  | I7D K146E G202R N224D I151T E34T E159L E161S        | 9.2208                               | 0.865038                        |
| R6_6  | I7D K146E G202R N224D I151T E87R M139G I102W        | 18.7026                              | 0.888853                        |
| R6_7  | I7D K146E G202R N224D I151T H228G L241V L65V        | 20.2239                              | 1.776604                        |
| R6_8  | I7D K146E G202R N224D I151T K19A A124H R59H         | 8.1041                               | 2.028205                        |
| R6_9  | I7D K146E G202R N224D I151T A9I V140Y K147R         | 32.8882                              | 1.550033                        |
| R6_10 | I7D K146E G202R N224D I151T G43V N25M G80D          | 39.5216                              | 1.313835                        |
| R6_11 | I7Q K146E G202R N224D F229S N103Q F227K G164E V169T | 24.7841                              | 0.979464                        |
| R6_12 | I7Q K146E G202R N224D F229S N103Q E239L K60R K243H  | -8.3477                              | 1.985088                        |
| R6_13 | I7Q K146E G202R N224D F229S N103Q P192M R230S W50P  | 16.52                                | 0.607212                        |
| R6_14 | I7Q K146E G202R N224D F229S N103Q D219G L241S V246D | 33.8276                              | 0.518982                        |
| R6_15 | I7Q K146E G202R N224D F229S N103Q A218W P76N E159C  | 47.2909                              | 1.65398                         |
| R6_16 | I7Q K146E G202R N224D F229S N103Q L47V V18K K206F   | 4.3307                               | 1.826064                        |
| R6_17 | I7Q K146E G202R N224D F229S N103Q Q72K E251Y E71T   | -1.4923                              | 1.806021                        |
| R6_18 | I7Q K146E G202R N224D F229S N103Q F120I D183S E108Y | 7.5634                               | 1.486437                        |
| R6_19 | I7Q K146E G202R N224D F229S N103Q R175Q F77T R163C  | 6.8093                               | 0.953207                        |
| R6_20 | I7Q K146E G202R N224D F229S N103Q D183P F86K N22E   | 5.8305                               | 1.335689                        |
| R6_21 | I7S K19E G202R N224D V190M G15N I52T I102Q          | 15.0419                              | 0.830404                        |

|       |                                                                   |          |          |
|-------|-------------------------------------------------------------------|----------|----------|
| R6_22 | I7S K19E G202R N224D V190M S225G F138D K60W                       | 16.7671  | 2.002205 |
| R6_23 | I7S K19E G202R N224D V190M D174N A8P A106Q                        | 35.6279  | 2.212158 |
| R6_24 | I7S K19E G202R N224D V190M T104S F38Q G80A                        | 23.6187  | 2.535019 |
| R6_25 | I7S K19E G202R N224D V190M H228F E236Y Y39E                       | 7.5988   | 1.900614 |
| R6_26 | I7S K19E G202R N224D V190M I83T E57W E24M                         | 12.2654  | 1.643638 |
| R6_27 | I7S K19E G202R N224D V190M F227D G96Y E91A                        | 25.4014  | 2.091616 |
| R6_28 | I7S K19E G202R N224D V190M Y182L S29V G181M                       | 6.6493   | 1.619869 |
| R6_29 | I7S K19E G202R N224D V190M S180E I168K I83Q                       | 34.5987  | 2.077871 |
| R6_30 | I7S K19E G202R N224D V190M G96Y G80H G121H                        | 57.3862  | 2.681765 |
| R6_31 | I7S K19E G202R N224D E239M D85W E159L V18S                        | 5.3568   | 2.290612 |
| R6_32 | I7S K19E G202R N224D E239M Q118A K68A G171Y                       | 3.5626   | 2.112947 |
| R6_33 | I7S K19E G202R N224D E239M S180T I151T I93F                       | 0.4268   | 2.044038 |
| R6_34 | I7S K19E G202R N224D E239M L250E N25T L153A                       | 10.9356  | 1.630455 |
| R6_35 | I7S K19E G202R N224D E239M R154E D51F S111I                       | 1.4912   | 2.038115 |
| R6_36 | I7S K19E G202R N224D E239M G81A E34P V248I                        | 9.2252   | 1.785763 |
| R6_37 | I7S K19E G202R N224D E239M G36W A218N T114W                       | 49.1664  | 1.883796 |
| R6_38 | I7S K19E G202R N224D E239M A131H V66T V248F                       | 25.9938  | 2.131537 |
| R6_39 | I7S K19E G202R N224D E239M K162W P192M V160G                      | 8.2398   | 2.293581 |
| R6_40 | I7S K19E G202R N224D E239M G203K N22D A130W                       | 22.6763  | 1.906366 |
| R6_41 | I7T K146T I199Q F86L I173C L176D F227L E64W G166M S180P           | 1.0461   | 2.366244 |
| R6_42 | I7T K146T I199Q F86L I173V L176D F227L E64W F210C H209V<br>L215T  | 17.397   | 2.135462 |
| R6_43 | I7T K146T I199Q F86L I173V L176D F227L E64W L10D S111H<br>V158E   | 12.6641  | 1.383808 |
| R6_44 | I7T K146T I199Q F86L I173V L176D F227L E64W T114Y K222M<br>S90R   | -12.5303 | 0.769945 |
| R6_45 | I7T K146T I199Q F86L I173V L176D F227L E64W K13N N109A<br>A54E    | 1.5054   | 2.386343 |
| R6_46 | I7T K146T I199Q F86L I173V L176D F227L E64W A204G A200C<br>L112N  | 10.1206  | 0.77211  |
| R6_47 | I7T K146T I199Q F86L I173V L176D F227L E64W K179M F210M<br>Q115R  | 10.0342  | 1.989846 |
| R6_48 | I7T K146T I199Q F86L I173V L176D F227L E64W Q123K V126T<br>R133V  | -0.082   | 2.371224 |
| R6_49 | I7T K146T I199Q F86L I173V L176D F227L E64W L63V E161T<br>V157H   | 10.0044  | 2.357851 |
| R6_50 | I7T K146T I199Q F86L I173V L176D F227L E64W V158W R163I<br>L112R  | 11.4778  | 2.119153 |
| R6_51 | I7T K146T I199Q F86L I173V L176D F227L E231S L65A V234Q<br>E57G   | 19.895   | 1.576543 |
| R6_52 | I7T K146T I199Q F86L I173V L176D F227L E231S A54I A70G L170D      | 20.9452  | 1.174878 |
| R6_53 | I7T K146T I199Q F86L I173V L176D F227L E231S N224L V234H<br>E161V | 15.8692  | 2.017679 |

|       |                                                                |         |          |
|-------|----------------------------------------------------------------|---------|----------|
| R6_54 | I7T K146T I199Q F86L I173V L176D F227L E231S K238S E185H V160D | 29.0821 | 2.125947 |
| R6_55 | I7T K146T I199Q F86L I173V L176D F227L E231S M1T M207E         | 12.5544 | 1.032211 |
| R6_56 | I7T K146T I199Q F86L I173V L176D F227L E231S D45K K222A E236D  | 15.1899 | 0.163357 |
| R6_57 | I7T K146T I199Q F86L I173V L176D F227L E231S W156Y E167F T114M | 12.4308 | 1.896938 |
| R6_58 | I7T K146T I199Q F86L I173V L176D F227L E231S D98F F189I A130G  | -8.3726 | 1.809391 |
| R6_59 | I7T K146T I199Q F86L I173V L176D F227L E231S T119W Q118W A200M | -8.8877 | 2.049167 |
| R6_60 | I7T K146T I199Q F86L I173V L176D F227L E231S D85R G181S T119P  | 22.7848 | 1.032753 |
| R6_61 | I7D G202R N224D V12M R5D E251I G164W                           | 10.3214 | 0.691923 |
| R6_62 | I7D G202R N224D V12M T149F I129Y W50C                          | 38.1102 | 0.427876 |
| R6_63 | I7D G202R N224D V12M V157F D31I A200Q                          | 22.2338 | 1.709476 |
| R6_64 | I7D G202R N224D V12M I113P N25T E87L                           | 9.7947  | -0.23825 |
| R6_65 | I7D G202R N224D V12R Q115C S48C                                | 9.6933  | 1.054112 |
| R6_66 | I7D G202R N224D V12M A200D H228T G82N                          | 18.9655 | 1.687562 |
| R6_67 | I7D G202R N224D V12M L211D T53D L215I                          | 17.6574 | 1.345295 |
| R6_68 | I7D G202R N224D V12M M207F G80H L253D                          | 53.2226 | 0.605108 |
| R6_69 | I7D G202S N224D V12M G150P E91L                                | 7.7947  | 1.799092 |
| R6_70 | I7D G202R N224D V12M A3C L152A G177R                           | 7.6975  | 0.447504 |
| R6_71 | I7D G202R N224D V12M A54D G171A                                | -3.1845 | 1.306708 |
| R6_72 | I7D G202R N224D K19E K146T                                     | 1.453   | 1.523727 |
| R6_73 | I7Q K146E G202R N224K F229S K132S F141H T142L                  | 11.9457 | 1.099562 |
| R6_74 | I7Q K146E G202R N224D F229S K132S E46M G80L L10K               | 41.0735 | 1.050319 |
| R6_75 | I7Q K146E G202R N224D F229Y K132S K60F E185H                   | -1.763  | 1.644657 |
| R6_76 | I7Q K146E G202R N224D F229S K132S I6E V190L D135A              | 27.5338 | 1.711406 |
| R6_77 | I7Q K146E G202R N224D F229S K132S V56H E251Y Y182N             | 21.5343 | 1.796814 |
| R6_78 | I7Q K146E G202Q N224D F229S K132S D74S R163W                   | 8.1405  | 2.483228 |
| R6_79 | I7Q K146E G202R N224D F229S K132S V140Q F227A Y39V             | 36.7006 | 1.235729 |
| R6_80 | I7Q K146E G202R N224D F229S K132S Y143M K4V K242W              | -3.0529 | 1.259893 |
| R6_81 | I7Q K146E G202R N224D F229S K132S V125R D174N I173H            | 21.2476 | 1.069762 |
| R6_82 | I7Q K146E G202R N224D F229S K132S A216V T104V D183L            | 6.8825  | 1.606626 |
| R6_83 | I7S K19E G202R N224G S144H L35A F214K                          | 27.2149 | 1.587074 |
| R6_84 | I7S K19E G202R N224D S144H G217Q T178N S122C                   | 4.3257  | 2.118727 |
| R6_85 | I7S K19E G202R N224D S144H R175W H201K G145W                   | 2.1054  | -0.42473 |
| R6_86 | I7S K19E G202R N224D S144H I93T V169S A204M                    | 26.0211 | 2.25983  |
| R6_87 | I7S K19E G202R N224D S144H K13Y Y240S G166C                    | 8.6285  | 1.523624 |
| R6_88 | I7S K19E G202R N224D S144H V140F G43E G217Y                    | 34.3372 | 1.755721 |
| R6_89 | I7S K19E G202R N224D S144H T178S A105C A8Y                     | 15.9739 | 1.673982 |
| R6_90 | I7S K19E G202R N224D S144H V234M Y143F W156G                   | 23.7117 | 1.729843 |

|        |                                                     |         |          |
|--------|-----------------------------------------------------|---------|----------|
| R6_91  | I7S K19E G202R N224D S144H S90W D155L W156F         | -7.6782 | 1.896569 |
| R6_92  | I7S K19E G202R N224D S144H A9I Q115V G150C          | 6.5945  | 1.903842 |
| R6_93  | I7D K146E G202R N224D I102L E108P K206R A8P         | 24.7477 | 2.032606 |
| R6_94  | I7D K146E G202R N224D I102L F38Y G80I D183V         | 39.9394 | 0.887196 |
| R6_95  | I7D K146E G202R N224D I102L L253M D135A Y143D       | 3.2468  | 1.638967 |
| R6_96  | I7D K146E G202R N224D I102L A130H I168L E91I        | 9.69    | 1.407671 |
| R6_97  | I7D K146E G202R N224D I102L K99M P76V I232Y         | 10.4951 | 1.5209   |
| R6_98  | I7D K146E G202R N224D I102L V12C H84W V79M          | 5.7513  | 0.768532 |
| R6_99  | I7D K146E G202R N224D I102L L170A F38A T53R         | 17.8256 | 1.554059 |
| R6_100 | I7D K146E G202R N224D I102L V248K F120E D174M       | 28.1362 | 1.807758 |
| R6_101 | I7D K146E G202R N224D I102L A97C I42L F49M          | 4.8473  | 0.973602 |
| R6_102 | I7D K146E G202R N224D I102L V18E I42G I187V         | 13.0953 | 0.086593 |
| R6_103 | I7Q K146E G202R N224D F229S P197W R188Q H84C V69N   | 9.9712  | 1.337716 |
| R6_104 | I7Q K146E G202W N224D F229S P197W Q72V Y143L        | -0.9068 | 2.546014 |
| R6_105 | I7Q K146E G202R N224D F229S P197W K13I D135C M62R   | 10.1141 | 2.42903  |
| R6_106 | I7Q K146E G202R N224D F229S P197W L241F S111T R154W | 13.412  | 1.339951 |
| R6_107 | I7Q K146E G202R N224D F229S P197W T61L L94H M207A   | 7.0261  | 2.135224 |
| R6_108 | I7Q K146E G202R N224D F229S P197W W156A K37L V69M   | 16.94   | 1.886372 |
| R6_109 | I7Q K146E G202R N224D F229S P197W K147S I93V T78G   | 10.0105 | 1.348725 |
| R6_110 | I7Q K146E G202R N224D F229S P197W L35A A105N F120Q  | 25.592  | 1.356338 |
| R6_111 | I7Q K146E G202R N224D F229S P197W D219T A9I L250S   | 24.1969 | 1.302424 |
| R6_112 | I7Q K146E G202R N224D F229S P197W V157G A221C V33F  | 15.2964 | 1.457007 |
| R6_113 | I7D K146E G202R N224D L47I S111G I232P S90H         | 19.9695 | 1.878916 |
| R6_114 | I7D K146E G202R N224D L47I A105H M1K E251V          | 15.4443 | 1.787848 |
| R6_115 | I7D K146E G202R N224P L47I A70Q V125L               | 10.5668 | 0.68505  |
| R6_116 | I7D K146E G202R N224D L47I L176F A218Q G82S         | 24.5314 | 1.945509 |
| R6_117 | I7D K146E G202R N224D L47I I168E Q72H D135V         | 19.7095 | 0.296108 |
| R6_118 | I7D K146E G202R N224D L47I P110N I42T L237V         | 21.9016 | 1.450983 |
| R6_119 | I7D K146E G202R N224D L47I S144K S111C I42Q         | 3.7206  | 1.727913 |
| R6_120 | I7D K146E G202R N224D L47I T194P A105T L152G        | 30.4214 | 1.459889 |
| R6_121 | I7D K146E G202R N224D L47I G164P I187V A117R        | 68.3046 | 2.121582 |
| R6_122 | I7D K146E G202R N224D L47I K147V T195P A9F          | 8.6732  | 0.830204 |

**Table S2.** R5 and R6 mutants with  $G_{elec}$  values calculated based on the first 50 ns out of each 100 ns that used in the calculation of Table S1.

**R5 Mutants**

| Index | Mutant                                              | $G_{elec}$ (kcal/mol) |
|-------|-----------------------------------------------------|-----------------------|
| R5_1  | I7D K146E G202R N224D I102L                         | 1.05767               |
| R5_2  | I7D K146E G202R N224D G80I                          | 1.400463              |
| R5_3  | I7D K146E G202R N224D I151T                         | 1.366507              |
| R5_4  | I7D K146E G202R N224D I83A                          | 2.144801              |
| R5_5  | I7D K146E G202R N224D L241K                         | 1.495664              |
| R5_6  | I7D K146E G202R N224D S55P                          | 1.775713              |
| R5_7  | I7D K146E G202R N224D S122C                         | 2.418011              |
| R5_8  | I7D K146E G202R N224D D28H                          | 0.932835              |
| R5_9  | I7D K146E G202R N224D L10E                          | 1.727324              |
| R5_10 | I7D K146E G202R N224D I83E                          | 1.338194              |
| R5_11 | I7D G202R N224D V12M                                | 1.285187              |
| R5_12 | I7D K146E G202R N224D L47I                          | 2.413852              |
| R5_13 | I7T K146T I199Q F86L I173V L176D F227L V125N        | 1.553837              |
| R5_14 | I7T K146T I199Q F86L I173V L176D F227L I75T         | 2.134146              |
| R5_15 | I7T K146T I199Q F86L I173V L176D F227L G136A        | 0.386611              |
| R5_16 | I7T K146T I199Q F86L I173V L176D F227L L215C        | 2.267702              |
| R5_17 | I7T K146T I199Q F86L I173V L176D F227L T53Y         | 2.219869              |
| R5_18 | I7T K146T I199Q F86L I173V L176D F227L E231S        | 1.361821              |
| R5_19 | I7T K146T I199Q F86L I173V L176D F227L D85W         | 2.232541              |
| R5_20 | I7T K146T I199Q F86L I173V L176D F227L L94R         | 2.0791                |
| R5_21 | I7T K146T I199Q F86L I173V L176D F227L E64W         | 2.078755              |
| R5_22 | I7T K146T I199Q F86L I173V L176D F227L F77V         | 1.750233              |
| R5_23 | I7S K19E G202R N224D L26A                           | 2.509062              |
| R5_24 | I7S K19E G202R N224D V190M                          | 1.910481              |
| R5_25 | I7S K19E G202R N224D E87I                           | 2.298244              |
| R5_26 | I7S K19E G202R N224D S144Y                          | 2.31771               |
| R5_27 | I7S K19E G202R N224D S144H                          | 2.01021               |
| R5_28 | I7S K19E G202R N224D E71Q                           | 2.011669              |
| R5_29 | I7S K19E G202R N224D E239M                          | 1.771831              |
| R5_30 | I7S K19E G202R N224D E64M                           | 2.659577              |
| R5_31 | I7S K19E G202R N224D G164Q                          | 2.064943              |
| R5_32 | I7S K19E G202R N224D I168W                          | 2.332201              |
| R5_33 | I7V K146E I199Q N224D L162P I173A L176I F229S R5K   | 2.413945              |
| R5_34 | I7V K146E I199Q N224D L162P I173A L176I F229S H209E | 3.405914              |
| R5_35 | I7V K146E I199Q N224D L162P I173A L176I F229S N109F | 2.787596              |



|       |                                                     |          |
|-------|-----------------------------------------------------|----------|
| R5_36 | I7V K146E I199Q N224D L162P I173A L176I F229S G121R | 2.751543 |
| R5_37 | I7V K146E I199Q N224D L162P I173A L176I F229S T195Q | 1.548805 |
| R5_38 | I7V K146E I199Q N224D L162P I173A L176I F229S L211N | 2.753345 |
| R5_39 | I7V K146E I199Q N224D L162P I173A L176I F229S V79N  | 3.075296 |
| R5_40 | I7V K146E I199Q N224D L162P I173A L176I F229S L237E | 1.393274 |
| R5_41 | I7V K146E I199Q N224D L162P I173A L176I F229S L196Q | 2.567829 |
| R5_42 | I7V K146E I199Q N224D L162P I173A L176I F229S L35E  | 3.024855 |
| R5_43 | I7Q K146E I199V N224D F227L F38G                    | 2.405695 |
| R5_44 | I7Q K146E I199V N224D F227L V127M                   | 1.414554 |
| R5_45 | I7Q K146E I199V N224D F227L E231I                   | 2.866997 |
| R5_46 | I7Q K146E I199V N224D F227L L176S                   | 2.825156 |
| R5_47 | I7Q K146E I199V N224D F227L W50E                    | -0.67384 |
| R5_48 | I7Q K146E I199V N224D F227L Q123C                   | 2.742804 |
| R5_49 | I7Q K146E I199V N224D F227L E212T                   | 2.98337  |
| R5_50 | I7Q K146E I199V N224D F227L I232G                   | 1.484956 |
| R5_51 | I7Q K146E I199V N224D F227L V33K                    | 1.299182 |
| R5_52 | I7Q K146E I199V N224D F227L K4E                     | 2.35174  |
| R5_53 | I7Q K146E G202R N224D F229S G96L                    | 1.921055 |
| R5_54 | I7Q K146E G202R N224D F229S N103Q                   | 1.801213 |
| R5_55 | I7Q K146E G202R N224D F229S G177P                   | 2.42626  |
| R5_56 | I7Q K146E G202R N224D F229S A223R                   | 2.062878 |
| R5_57 | I7Q K146E G202R N224D F229S L237R                   | 2.201105 |
| R5_58 | I7Q K146E G202R N224D F229S A220F                   | 2.214115 |
| R5_59 | I7Q K146E G202R N224D F229S P197W                   | 1.610854 |
| R5_60 | I7Q K146E G202R N224D F229S K132S                   | 1.78619  |
| R5_61 | I7Q K146E G202R N224D F229S G36W                    | 2.257044 |
| R5_62 | I7Q K146E G202R N224D F229S D51P                    | 2.482978 |

## R6 Mutants

| Index | Mutant                                       | G <sub>elec</sub> (kcal/mol) |
|-------|----------------------------------------------|------------------------------|
| R6_1  | I7D K146E G202R N224D I151T A200E T104P T61V | 0.668798                     |
| R6_2  | I7D K146E G202R N224D I151T E34Y Q118Y E212T | 1.661571                     |
| R6_3  | I7D K146E G202R N224D I151T V134F E64Q S111M | 1.063145                     |
| R6_4  | I7D K146E G202R N224A I151T N247E Y143K      | 0.61898                      |
| R6_5  | I7D K146E G202R N224D I151T E34T E159L E161S | 0.955816                     |
| R6_6  | I7D K146E G202R N224D I151T E87R M139G I102W | 1.461106                     |
| R6_7  | I7D K146E G202R N224D I151T H228G L241V L65V | 1.881447                     |
| R6_8  | I7D K146E G202R N224D I151T K19A A124H R59H  | 1.770084                     |
| R6_9  | I7D K146E G202R N224D I151T A9I V140Y K147R  | 1.479986                     |
| R6_10 | I7D K146E G202R N224D I151T G43V N25M G80D   | 1.906273                     |

|       |                                                                  |          |
|-------|------------------------------------------------------------------|----------|
| R6_11 | I7Q K146E G202R N224D F229S N103Q F227K G164E V169T              | 0.990702 |
| R6_12 | I7Q K146E G202R N224D F229S N103Q E239L K60R K243H               | 1.804799 |
| R6_13 | I7Q K146E G202R N224D F229S N103Q P192M R230S W50P               | 0.628775 |
| R6_14 | I7Q K146E G202R N224D F229S N103Q D219G L241S V246D              | 0.521394 |
| R6_15 | I7Q K146E G202R N224D F229S N103Q A218W P76N E159C               | 1.388519 |
| R6_16 | I7Q K146E G202R N224D F229S N103Q L47V V18K K206F                | 1.609724 |
| R6_17 | I7Q K146E G202R N224D F229S N103Q Q72K E251Y E71T                | 1.714088 |
| R6_18 | I7Q K146E G202R N224D F229S N103Q F120I D183S E108Y              | 1.348386 |
| R6_19 | I7Q K146E G202R N224D F229S N103Q R175Q F77T R163C               | 1.830235 |
| R6_20 | I7Q K146E G202R N224D F229S N103Q D183P F86K N22E                | 1.594762 |
| R6_21 | I7S K19E G202R N224D V190M G15N I52T I102Q                       | 0.401359 |
| R6_22 | I7S K19E G202R N224D V190M S225G F138D K60W                      | 1.89525  |
| R6_23 | I7S K19E G202R N224D V190M D174N A8P A106Q                       | 2.373056 |
| R6_24 | I7S K19E G202R N224D V190M T104S F38Q G80A                       | 2.555123 |
| R6_25 | I7S K19E G202R N224D V190M H228F E236Y Y39E                      | 2.148678 |
| R6_26 | I7S K19E G202R N224D V190M I83T E57W E24M                        | 1.790345 |
| R6_27 | I7S K19E G202R N224D V190M F227D G96Y E91A                       | 2.217455 |
| R6_28 | I7S K19E G202R N224D V190M Y182L S29V G181M                      | 1.681322 |
| R6_29 | I7S K19E G202R N224D V190M S180E I168K I83Q                      | 2.007352 |
| R6_30 | I7S K19E G202R N224D V190M G96Y G80H G121H                       | 2.689698 |
| R6_31 | I7S K19E G202R N224D E239M D85W E159L V18S                       | 2.460356 |
| R6_32 | I7S K19E G202R N224D E239M Q118A K68A G171Y                      | 2.127553 |
| R6_33 | I7S K19E G202R N224D E239M S180T I151T I93F                      | 1.950752 |
| R6_34 | I7S K19E G202R N224D E239M L250E N25T L153A                      | 1.823458 |
| R6_35 | I7S K19E G202R N224D E239M R154E D51F S111I                      | 2.043237 |
| R6_36 | I7S K19E G202R N224D E239M G81A E34P V248I                       | 2.018056 |
| R6_37 | I7S K19E G202R N224D E239M G36W A218N T114W                      | 1.934048 |
| R6_38 | I7S K19E G202R N224D E239M A131H V66T V248F                      | 2.1142   |
| R6_39 | I7S K19E G202R N224D E239M K162W P192M V160G                     | 2.290127 |
| R6_40 | I7S K19E G202R N224D E239M G203K N22D A130W                      | 1.203576 |
| R6_41 | I7T K146T I199Q F86L I173C L176D F227L E64W G166M S180P          | 2.483159 |
| R6_42 | I7T K146T I199Q F86L I173V L176D F227L E64W F210C H209V L215T    | 2.248835 |
| R6_43 | I7T K146T I199Q F86L I173V L176D F227L E64W L10D S111H V158E     | 1.555916 |
| R6_44 | I7T K146T I199Q F86L I173V L176D F227L E64W T114Y K222M S90R     | 0.748774 |
| R6_45 | I7T K146T I199Q F86L I173V L176D F227L E64W K13N N109A A54E      | 2.424472 |
| R6_46 | I7T K146T I199Q F86L I173V L176D F227L E64W A204G A200C L112N    | 1.052807 |
| R6_47 | I7T K146T I199Q F86L I173V L176D F227L E64W K179M F210M<br>Q115R | 1.823341 |
| R6_48 | I7T K146T I199Q F86L I173V L176D F227L E64W Q123K V126T R133V    | 2.61254  |
| R6_49 | I7T K146T I199Q F86L I173V L176D F227L E64W L63V E161T V157H     | 2.606737 |
| R6_50 | I7T K146T I199Q F86L I173V L176D F227L E64W V158W R163I L112R    | 2.246874 |
| R6_51 | I7T K146T I199Q F86L I173V L176D F227L E231S L65A V234Q E57G     | 1.883324 |
| R6_52 | I7T K146T I199Q F86L I173V L176D F227L E231S A54I A70G L170D     | 1.25915  |

|       |                                                                   |          |
|-------|-------------------------------------------------------------------|----------|
| R6_53 | I7T K146T I199Q F86L I173V L176D F227L E231S N224L V234H E161V    | 2.095579 |
| R6_54 | I7T K146T I199Q F86L I173V L176D F227L E231S K238S E185H V160D    | 2.062308 |
| R6_55 | I7T K146T I199Q F86L I173V L176D F227L E231S M1T M207E            | 1.852295 |
| R6_56 | I7T K146T I199Q F86L I173V L176D F227L E231S D45K K222A E236D     | 0.185846 |
| R6_57 | I7T K146T I199Q F86L I173V L176D F227L E231S W156Y E167F<br>T114M | 2.47455  |
| R6_58 | I7T K146T I199Q F86L I173V L176D F227L E231S D98F F189I A130G     | 2.118176 |
| R6_59 | I7T K146T I199Q F86L I173V L176D F227L E231S T119W Q118W<br>A200M | 2.128687 |
| R6_60 | I7T K146T I199Q F86L I173V L176D F227L E231S D85R G181S T119P     | 1.163173 |
| R6_61 | I7D G202R N224D V12M R5D E251I G164W                              | 0.587225 |
| R6_62 | I7D G202R N224D V12M T149F I129Y W50C                             | 0.497627 |
| R6_63 | I7D G202R N224D V12M V157F D31I A200Q                             | 1.149388 |
| R6_64 | I7D G202R N224D V12M I113P N25T E87L                              | -0.10702 |
| R6_65 | I7D G202R N224D V12R Q115C S48C                                   | 1.085609 |
| R6_66 | I7D G202R N224D V12M A200D H228T G82N                             | 1.286209 |
| R6_67 | I7D G202R N224D V12M L211D T53D L215I                             | 1.718081 |
| R6_68 | I7D G202R N224D V12M M207F G80H L253D                             | 0.757418 |
| R6_69 | I7D G202S N224D V12M G150P E91L                                   | 2.002389 |
| R6_70 | I7D G202R N224D V12M A3C L152A G177R                              | 0.885939 |
| R6_71 | I7D G202R N224D V12M A54D G171A                                   | 1.120153 |
| R6_72 | I7D G202R N224D K19E K146T                                        | 1.596297 |
| R6_73 | I7Q K146E G202R N224K F229S K132S F141H T142L                     | 1.169497 |
| R6_74 | I7Q K146E G202R N224D F229S K132S E46M G80L L10K                  | 1.189239 |
| R6_75 | I7Q K146E G202R N224D F229Y K132S K60F E185H                      | 1.587524 |
| R6_76 | I7Q K146E G202R N224D F229S K132S I6E V190L D135A                 | 1.671097 |
| R6_77 | I7Q K146E G202R N224D F229S K132S V56H E251Y Y182N                | 1.597737 |
| R6_78 | I7Q K146E G202Q N224D F229S K132S D74S R163W                      | 2.771105 |
| R6_79 | I7Q K146E G202R N224D F229S K132S V140Q F227A Y39V                | 1.315407 |
| R6_80 | I7Q K146E G202R N224D F229S K132S Y143M K4V K242W                 | 1.229661 |
| R6_81 | I7Q K146E G202R N224D F229S K132S V125R D174N I173H               | 1.684372 |
| R6_82 | I7Q K146E G202R N224D F229S K132S A216V T104V D183L               | 1.485294 |
| R6_83 | I7S K19E G202R N224G S144H L35A F214K                             | 1.297993 |
| R6_84 | I7S K19E G202R N224D S144H G217Q T178N S122C                      | 2.228668 |
| R6_85 | I7S K19E G202R N224D S144H R175W H201K G145W                      | -0.55657 |
| R6_86 | I7S K19E G202R N224D S144H I93T V169S A204M                       | 2.596152 |
| R6_87 | I7S K19E G202R N224D S144H K13Y Y240S G166C                       | 1.512919 |
| R6_88 | I7S K19E G202R N224D S144H V140F G43E G217Y                       | 1.576891 |
| R6_89 | I7S K19E G202R N224D S144H T178S A105C A8Y                        | 1.724893 |
| R6_90 | I7S K19E G202R N224D S144H V234M Y143F W156G                      | 1.766006 |
| R6_91 | I7S K19E G202R N224D S144H S90W D155L W156F                       | 1.946453 |
| R6_92 | I7S K19E G202R N224D S144H A9I Q115V G150C                        | 1.811797 |
| R6_93 | I7D K146E G202R N224D I102L E108P K206R A8P                       | 1.845815 |

|        |                                                     |          |
|--------|-----------------------------------------------------|----------|
| R6_94  | I7D K146E G202R N224D I102L F38Y G80I D183V         | 1.790019 |
| R6_95  | I7D K146E G202R N224D I102L L253M D135A Y143D       | 1.579808 |
| R6_96  | I7D K146E G202R N224D I102L A130H I168L E91I        | 1.557445 |
| R6_97  | I7D K146E G202R N224D I102L K99M P76V I232Y         | 1.510566 |
| R6_98  | I7D K146E G202R N224D I102L V12C H84W V79M          | 1.20597  |
| R6_99  | I7D K146E G202R N224D I102L L170A F38A T53R         | 1.599371 |
| R6_100 | I7D K146E G202R N224D I102L V248K F120E D174M       | 1.764707 |
| R6_101 | I7D K146E G202R N224D I102L A97C I42L F49M          | 1.114438 |
| R6_102 | I7D K146E G202R N224D I102L V18E I42G I187V         | 0.122115 |
| R6_103 | I7Q K146E G202R N224D F229S P197W R188Q H84C V69N   | 1.290974 |
| R6_104 | I7Q K146E G202W N224D F229S P197W Q72V Y143L        | 2.543158 |
| R6_105 | I7Q K146E G202R N224D F229S P197W K13I D135C M62R   | 1.98117  |
| R6_106 | I7Q K146E G202R N224D F229S P197W L241F S111T R154W | 1.556844 |
| R6_107 | I7Q K146E G202R N224D F229S P197W T61L L94H M207A   | 2.033685 |
| R6_108 | I7Q K146E G202R N224D F229S P197W W156A K37L V69M   | 1.90771  |
| R6_109 | I7Q K146E G202R N224D F229S P197W K147S I93V T78G   | 1.266248 |
| R6_110 | I7Q K146E G202R N224D F229S P197W L35A A105N F120Q  | 1.566663 |
| R6_111 | I7Q K146E G202R N224D F229S P197W D219T A9I L250S   | 1.185164 |
| R6_112 | I7Q K146E G202R N224D F229S P197W V157G A221C V33F  | 1.617854 |
| R6_113 | I7D K146E G202R N224D L47I S111G I232P S90H         | 1.689164 |
| R6_114 | I7D K146E G202R N224D L47I A105H M1K E251V          | 1.740965 |
| R6_115 | I7D K146E G202R N224P L47I A70Q V125L               | 0.432665 |
| R6_116 | I7D K146E G202R N224D L47I L176F A218Q G82S         | 2.0323   |
| R6_117 | I7D K146E G202R N224D L47I I168E Q72H D135V         | 0.979069 |
| R6_118 | I7D K146E G202R N224D L47I P110N I42T L237V         | 1.561373 |
| R6_119 | I7D K146E G202R N224D L47I S144K S111C I42Q         | 1.662601 |
| R6_120 | I7D K146E G202R N224D L47I T194P A105T L152G        | 1.636615 |
| R6_121 | I7D K146E G202R N224D L47I G164P I187V A117R        | 2.212662 |
| R6_122 | I7D K146E G202R N224D L47I K147V T195P A9F          | 0.756254 |

## References

1. Frisch, M. J.; Trucks, G. W.; Schlegel, H. B.; Scuseria, G. E.; Robb, M. A.; Cheeseman, J. R.; Scalmani, G.; Barone, V.; Petersson, G. A.; Nakatsuji, H.; Li, X.; Caricato, M.; Marenich, A. V.; Bloino, J.; Janesko, B. G.; Gomperts, R.; Mennucci, B.; Hratchian, H. P.; Ortiz, J. V.; Izmaylov, A. F.; Sonnenberg, J. L.; Williams; Ding, F.; Lipparini, F.; Egidi, F.; Goings, J.; Peng, B.; Petrone, A.; Henderson, T.; Ranasinghe, D.; Zakrzewski, V. G.; Gao, J.; Rega, N.; Zheng, G.; Liang, W.; Hada, M.; Ehara, M.; Toyota, K.; Fukuda, R.; Hasegawa, J.; Ishida, M.; Nakajima, T.; Honda, Y.; Kitao, O.; Nakai, H.; Vreven, T.; Throssell, K.; Montgomery Jr., J. A.; Peralta, J. E.; Ogliaro, F.; Bearpark, M. J.; Heyd, J. J.; Brothers, E. N.; Kudin, K. N.; Staroverov, V. N.; Keith, T. A.; Kobayashi, R.; Normand, J.; Raghavachari, K.; Rendell, A. P.; Burant, J. C.; Iyengar, S. S.; Tomasi, J.; Cossi, M.; Millam, J. M.; Klene, M.; Adamo, C.; Cammi, R.; Ochterski, J. W.; Martin, R. L.; Morokuma, K.; Farkas, O.; Foresman, J. B.; Fox, D. J. *Gaussian 16 Rev. C.01*, Wallingford, CT, 2016.
2. Khersonsky, O.; Röthlisberger, D.; Dym, O.; Albeck, S.; Jackson, C. J.; Baker, D.; Tawfik, D. S., Evolutionary Optimization of Computationally Designed Enzymes: Kemp Eliminases of the KE07 Series. *J. Mol.*

*Biol.* **2010**, *396*, 1025-1042.

3. Hong, N.-S.; Petrović, D.; Lee, R.; Gryn'Ova, G.; Purg, M.; Saunders, J.; Bauer, P.; Carr, P. D.; Lin, C.-Y.; Mabbitt, P. D.; Zhang, W.; Altamore, T.; Easton, C.; Coote, M. L.; Kamerlin, S. C. L.; Jackson, C. J., The evolution of multiple active site configurations in a designed enzyme. *Nat. Commun.* **2018**, *9*.
4. Lu, T.; Chen, F., Multiwfn: A multifunctional wavefunction analyzer. *J. Comput. Chem.* **2012**, *33*, 580-592.
5. Nivón, L. G.; Moretti, R.; Baker, D., A Pareto-Optimal Refinement Method for Protein Design Scaffolds. *PLoS ONE* **2013**, *8*, e59004.
6. Röthlisberger, D.; Khersonsky, O.; Wollacott, A. M.; Jiang, L.; Dechancie, J.; Betker, J.; Gallaher, J. L.; Althoff, E. A.; Zanghellini, A.; Dym, O.; Albeck, S.; Houk, K. N.; Tawfik, D. S.; Baker, D., Kemp elimination catalysts by computational enzyme design. *Nature* **2008**, *453*, 190-195.
7. Schrodinger, LLC, In; 2015.
8. D.A. Case, H. M. A., K. Belfon, I.Y. Ben-Shalom, S.R. Brozell, D.S. Cerutti, T.E. Cheatham, III, G.A. Cisneros, V.W.D. Cruzeiro, T.A. Darden, R.E. Duke, G. Giambasu, M.K. Gilson, H. Gohlke, A.W. Goetz, R. Harris, S. Izadi, S.A. Izmailov, C. Jin, K. Kasavajhala, M.C. Kaymak, E. King, A. Kovalenko, T. Kurtzman, T.S. Lee, S. LeGrand, P. Li, C. Lin, J. Liu, T. Luchko, R. Luo, M. Machado, V. Man, M. Manathunga, K.M. Merz, Y. Miao, O. Mikhailovskii, G. Monard, H. Nguyen, K.A. O'Hearn, A. Onufriev, F. Pan, S. Pantano, R. Qi, A. Rahnamoun, D.R. Roe, A. Roitberg, C. Sagui, S. Schott-Verdugo, J. Shen, C.L. Simmerling, N.R. Skrynnikov, J. Smith, J. Swails, R.C. Walker, J. Wang, H. Wei, R.M. Wolf, X. Wu, Y. Xue, D.M. York, S. Zhao, and P.A. Kollman Amber 2021.
9. Maier, J. A.; Martinez, C.; Kasavajhala, K.; Wickstrom, L.; Hauser, K. E.; Simmerling, C., ff14SB: Improving the Accuracy of Protein Side Chain and Backbone Parameters from ff99SB. *J. Chem. Theory Comput.* **2015**, *11*, 3696-3713.
10. Wang, N. X.; Wilson, A. K., The behavior of density functionals with respect to basis set. I. The correlation consistent basis sets. *The Journal of Chemical Physics* **2004**, *121*, 7632-7646.
11. Wang, J.; Wang, W.; Kollman, P. A.; Case, D. A., Automatic atom type and bond type perception in molecular mechanical calculations. *Journal of Molecular Graphics and Modelling* **2006**, *25*, 247-260.
12. Jakalian, A.; Jack, D. B.; Bayly, C. I., Fast, efficient generation of high-quality atomic charges. AM1-BCC model: II. Parameterization and validation. *J. Comput. Chem.* **2002**, *23*, 1623-1641.
13. Dolinsky, T. J.; Czodrowski, P.; Li, H.; Nielsen, J. E.; Jensen, J. H.; Klebe, G.; Baker, N. A., PDB2PQR: expanding and upgrading automated preparation of biomolecular structures for molecular simulations. *Nucleic Acids Res.* **2007**, *35*, W522-W525.
14. Olsson, M. H. M.; Søndergaard, C. R.; Rostkowski, M.; Jensen, J. H., PROPKA3: Consistent Treatment of Internal and Surface Residues in Empirical pKa Predictions. *J. Chem. Theory Comput.* **2011**, *7*, 525-537.
15. Ryckaert, J.-P.; Ciccotti, G.; Berendsen, H. J. C., Numerical integration of the cartesian equations of motion of a system with constraints: molecular dynamics of n-alkanes. *Journal of Computational Physics* **1977**, *23*, 327-341.
16. Loncharich, R. J.; Brooks, B. R.; Pastor, R. W., Langevin dynamics of peptides: The frictional dependence of isomerization rates of N-acetylalanyl-N'-methylamide. *Biopolymers* **1992**, *32*, 523-535.
17. Berendsen, H. J. C.; Postma, J. P. M.; Van Gunsteren, W. F.; Dinola, A.; Haak, J. R., Molecular dynamics with coupling to an external bath. *The Journal of Chemical Physics* **1984**, *81*, 3684-3690.
18. Bradshaw, R. T.; Dziedzic, J.; Skylaris, C.-K.; Essex, J. W., The Role of Electrostatics in Enzymes: Do Biomolecular Force Fields Reflect Protein Electric Fields? *J. Chem. Inf. Model.* **2020**, *60*, 3131-3144.
